# Supplementary material
Source: publisher figshare collection journal article supplement (https://rs.figshare.com/ndownloader/files/11448578)
Supplement: Supplementary file 1 [file 11448578]

Results from Experiment 1 (Rio, Dachner, & Warren)

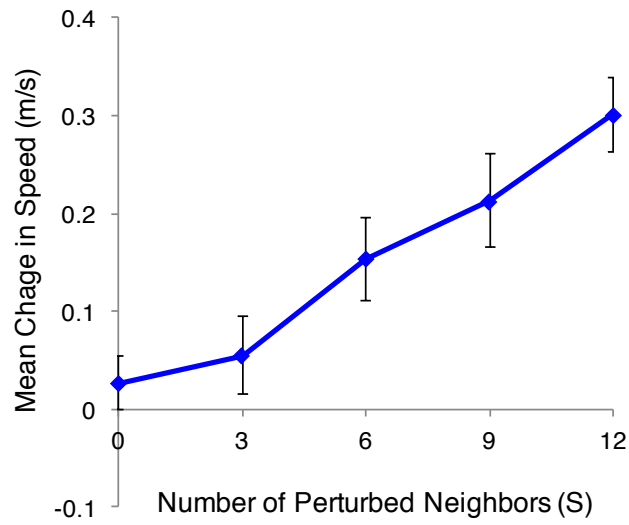

Figure S1. Speed perturbations in Experiment 1: Mean absolute change in speed as a function of the number of neighbors in the perturbed subset S. This figure is paired with Figure 2a in Rio, Dachner, & Warren. Error bars=SE of mean.

# Simulations of Experiment 1 (Rio, Dachner, & Warren)

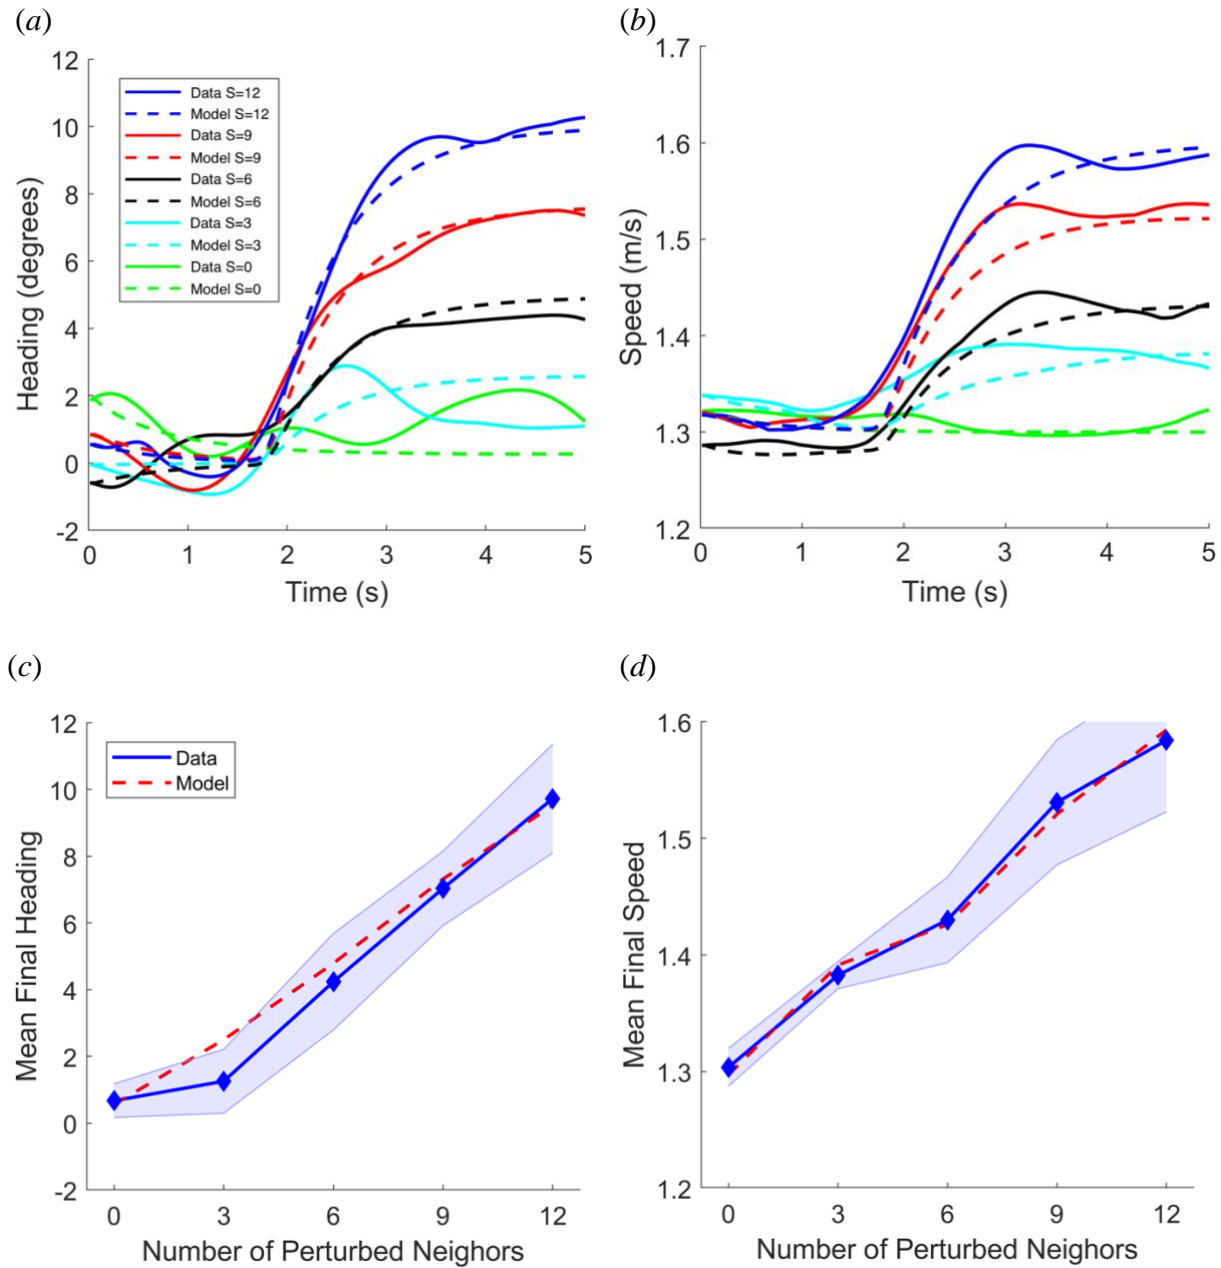

Figure S2. Simulations of heading perturbations and speed perturbations in Experiment 1. *Top:* Mean time series of (a) heading and (b) speed for human data (solid curves) and model (dashed curves) at each subset size  $S$  (number of perturbed neighbors, colored curves). *Bottom:* Mean absolute final (c) heading and (d) speed as a function of the number of perturbed neighbors  $S$ . Shaded regions = 95% CI for human data.

## Simulations of Experiment 2 (Rio, Dachner, & Warren)

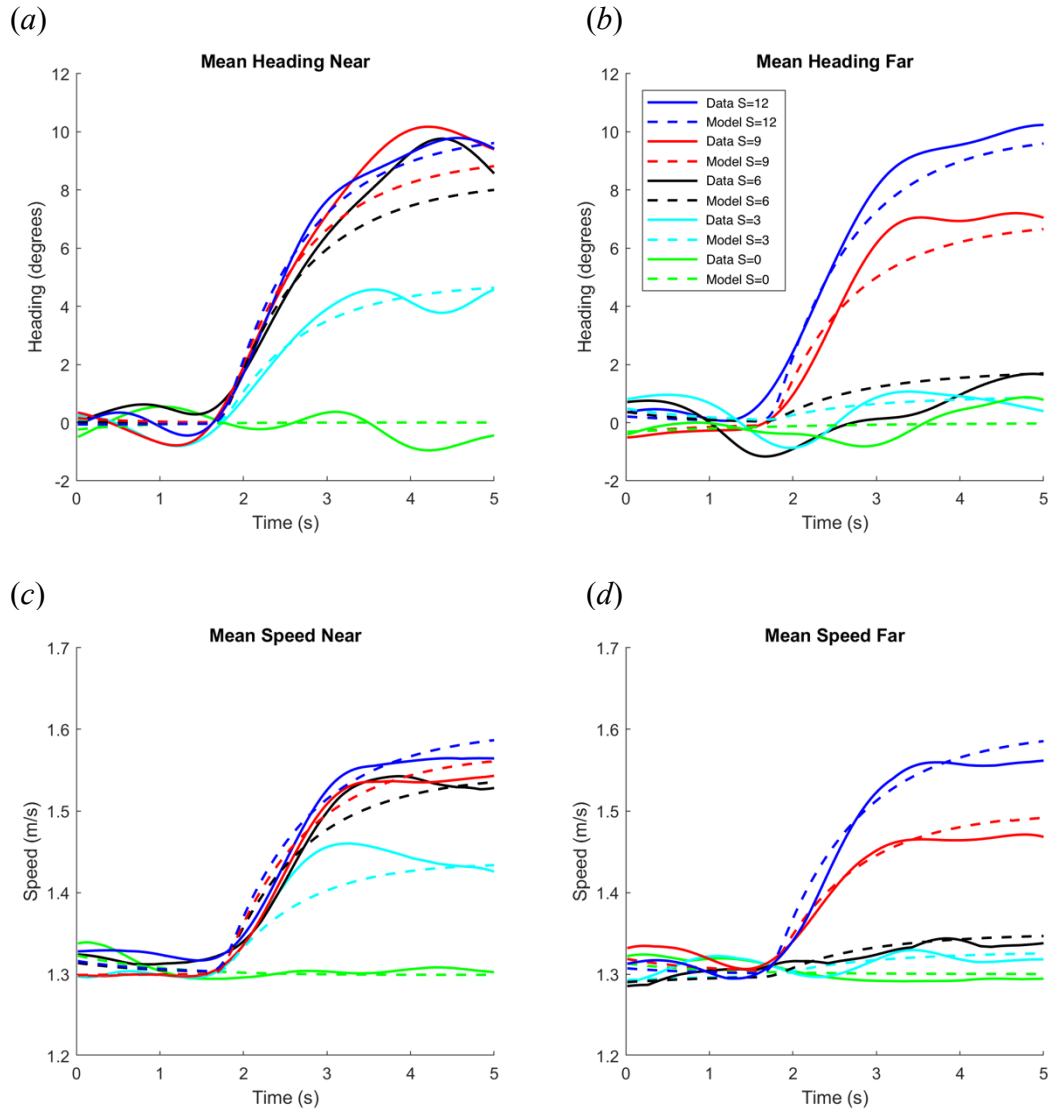

Figure S3. Mean time series for human data (solid curves) and model (dashed curves) in Experiment 2. *Top:* Mean time series of heading for each subset size  $S$  (number of perturbed neighbors, colored curves) in (a) the Near condition (~1.5m) and (b) the Far condition (~3.5m). *Bottom:* Mean time series of walking speed in (c) the Near condition and (b) the Far condition. Note that smaller subsets  $S=0,3,6$  (green, cyan, black) illustrate the effect of distance, as nearly all were in the near zone (5 neighbors) or the far zone (7 neighbors).

# Simulations of Individual Trajectories in a Human ‘Swarm’ (Rio, Dachner, & Warren)

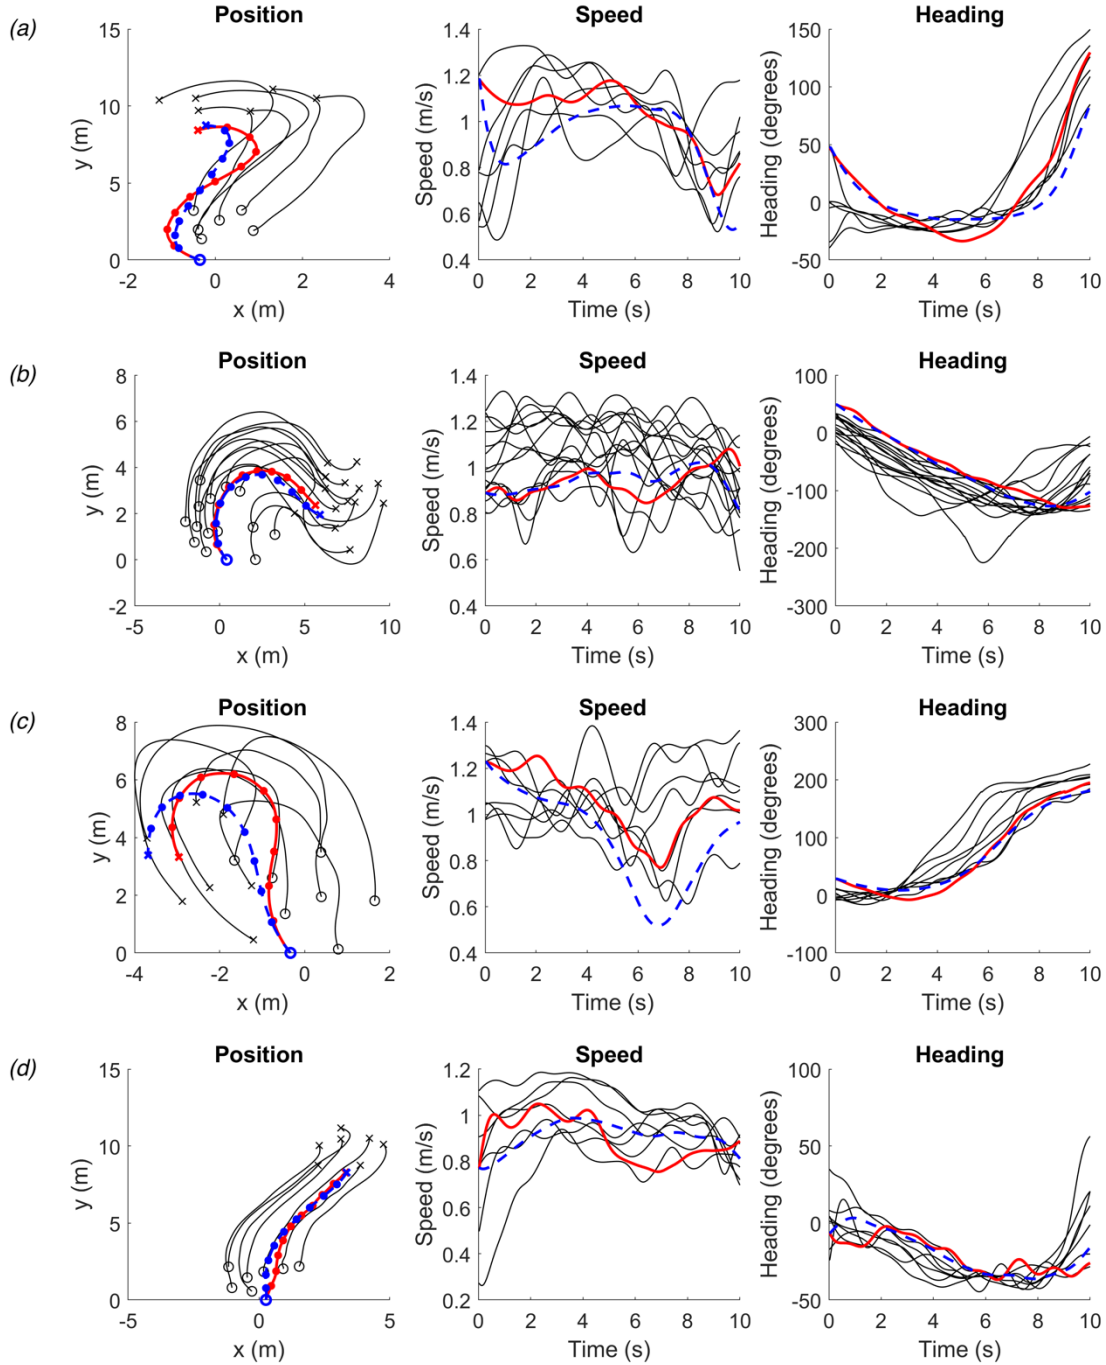

Figure S4. Simulations of sample 10s segments from the human ‘swarm’ data. (a) IPD=2m, mean position error=0.51m, speed  $r=.76$  (RMSE=0.14 m/s), heading  $r=0.94$  (RMSE=21.12°). (b) IPD=1m, mean position error=0.32m, speed  $r=0.24$  (RMSE=0.07 m/s), heading  $r=0.99$  (RMSE=9.3°). (c) IPD=2m, mean position error=0.60m, speed  $r=0.80$  (RMSE=0.18m/s), heading  $r=0.94$  (RMSE=10.01°). (d) IPD=2m, mean distance error=0.29m, speed  $r=0.33$  (RMSE=0.11 m/s), heading  $r=0.86$  (RMSE=7.14°). Participant = solid red curve, model = dashed blue curve, neighbors = black curves; O=starting positions, X=final positions.
